# Supplementary material for: Efficacy and Safety of Rivaroxaban Compared with Other Therapies Used in Patients with Peripheral Artery Disease Undergoing Peripheral Revascularization: A Systematic Literature Review and Network Meta-Analysis
Source: Cardiovasc Ther. 2021 Aug 24;2021:8561350. doi: 10.1155/2021/8561350 (PMC8407972; doi:10.1155/2021/8561350)
Supplement: Supplementary Materials — Supplementary Table 1: credibility assessment of trials included in the NMA [1]. Supplementary Table 2: input data for the NMA of the risk of myocardial infarction. Supplementary Table 3: input data for the NMA of the risk of ischemic stroke. Supplementary Table 4: input data for the NMA of the risk of cardiovascular death. Supplementary Table 5: input data for the NMA of the risk of all-cause mortality. Supplementary Table 6: input data for the NMA of the risk of any stroke. Supplementary Table 7: input data for the NMA of the risk of major bleeding. Supplementary Table 8: input data for the NMA of the risk of revascularization. Supplementary Figure 1: networks of evidence for the risk of amputations. Supplementary Figure 2: forest plots comparing RIV plus ASA versus comparators regarding amputation. Supplementary Figure 3: networks of evidence for the risk of myocardial infarction. Supplementary Figure 4: forest plots comparing RIV plus ASA versus comparators regarding myocardial infarction. Supplementary Figure 5: networks of evidence for the risk of ischemic stroke. Supplementary Figure 6: forest plots comparing RIV plus ASA versus comparators regarding ischemic stroke. Supplementary Figure 7: networks of evidence for the risk of cardiovascular death. Supplementary Figure 8: forest plots comparing RIV plus ASA versus comparators regarding cardiovascular death. Supplementary Figure 9: networks of evidence for the risk of all-cause mortality. Supplementary Figure 10: forest plots comparing RIV plus ASA versus comparators regarding all-cause mortality. Supplementary Figure 11: networks of evidence for the risk of any stroke. Supplementary Figure 12: forest plots comparing RIV plus ASA versus comparators regarding any stroke. Supplementary Figure 13: networks of evidence for the risk of major bleeding. Supplementary Figure 14: forest plots comparing RIV plus ASA versus comparators regarding major bleeding. Supplementary Figure 15: networks of evidence for the risk o [file 8561350.f1.zip]

Archive with 2 entries (2 files):
- PAD_NMA-Cardiovascular Theraputics-supplement.docx
- Supplementary Deascription.docx
